# Supplementary material for: Soybean Oil-Based Biopolymers Induced by Nonthermal Plasma to Enhance the Dyeing of Para-Aramids with a Cationic Dye
Source: MDPI journal article supplement (doi:10.3390/polym14030628), 2022-02-06
Supplement: s1 [file s1]

## **Supplementary Materials**

### **Soybean oil-based biopolymers induced by nonthermal plasma to enhance the dyeing of para-aramids with a cationic dye**

Caleb Metzcar <sup>b</sup>, Xiaofei Philip Ye <sup>a\*</sup>, Toni Wang <sup>b</sup>, Christopher J. Doona <sup>c,d</sup>

<sup>a</sup> Department of Biosystems Engineering and Soil Science, The University of Tennessee,  
Knoxville, TN 37996, U.S.A.

<sup>b</sup> Department of Food Science, The University of Tennessee, Knoxville, TN 37996, U.S.A.

<sup>c</sup> U.S. Army Combat Capabilities Development Command – Soldier Center, Natick, MA 01760,  
U.S.A.

<sup>d</sup> Research Affiliate, Massachusetts Institute of Technology, 77 Massachusetts Ave, Cambridge,  
MA 02139, U.S.A.

\* Corresponding author: Phone: +1-(865)-974-7129. Fax: +1-(865)-974-4514.

E-mail: xye2@utk.edu

Table S1. Characteristic FTIR bands of materials and the references.

| FTIR peak<br>(cm <sup>-1</sup> ) | Functional group                                           | Refs    | FTIR peak<br>(cm <sup>-1</sup> ) | Functional group                           | Refs     |
|----------------------------------|------------------------------------------------------------|---------|----------------------------------|--------------------------------------------|----------|
| <b>AESO</b>                      |                                                            |         | <b>Acrylic acid</b>              |                                            |          |
| 3344                             | –OH stretch (broad)                                        | [1, 2]  | 1695                             | C=O stretch                                | [3]      |
| 2922                             | –CH <sub>2</sub> asymmetric stretch                        | [1, 4]  | 1637                             | C=C stretch                                | [3, 5]   |
| 2852                             | –CH <sub>3</sub> symmetric stretch                         | [1, 4]  | 1432                             | CH <sub>2</sub> bending                    | [6]      |
| 1462                             | –CH <sub>2</sub> antisymmetric deformation                 | [1]     | 984                              | =CH <sub>2</sub> out-of-plane bending      | [5]      |
| 1742                             | –C=O triglyceride carbonyl stretch                         | [4]     | 1617                             | C=C stretch                                | [6]      |
| 1723                             | acrylate esters                                            | [7]     | 1297                             | C–C–O vibration                            | [6]      |
| 1638                             | –CH=CH <sub>2</sub> stretch of vinyl                       | [4, 8]  | 819                              | CH <sub>2</sub> out-of-plane bending       | [6]      |
| 1619                             | C=C of acrylate group                                      | [8, 9]  | <b>Soybean oil</b>               |                                            |          |
| 986                              | –CH <sub>2</sub> =CH(CO)–O– out of plane bending           | [8, 10] | 3009                             | =C–H stretch of aliphatic alkenes          | [11, 12] |
| 1406                             | acrylate CH <sub>2</sub> =CH scissoring of terminal alkene | [4]     | 2922                             | –CH <sub>2</sub> asymmetric stretch        | [11, 12] |
| 1190                             | C–O stretch of esters                                      | [4]     | 2852                             | –CH <sub>3</sub> symmetric stretch         | [11, 12] |
| 1250-1270                        | C–O–C stretch of oxirane                                   | [4, 10] | 1742                             | –C=O triglycerides carbonyl stretch        | [11, 12] |
| 822                              | oxirane vibration                                          | [2, 9]  | 1462                             | –CH <sub>2</sub> antisymmetric deformation | [11, 12] |
| 810                              | –C=C– rocking of acrylates                                 | [1, 9]  | 1160                             | C–O stretch of esters                      | [11, 12] |
| <b>Para-aramid</b>               |                                                            |         |                                  |                                            |          |
| 3313                             | –N–H stretch                                               | [13]    |                                  |                                            |          |
| 1638                             | amide I C=O stretch                                        | [13]    |                                  |                                            |          |
| 1538                             | –N–H deformation                                           | [13]    |                                  |                                            |          |
| 1513                             | amide II                                                   | [14]    |                                  |                                            |          |
| 1305                             | C–N stretch of amide III                                   | [14]    |                                  |                                            |          |
| 1017, 820                        | C–H of para-aromatic rings                                 | [14]    |                                  |                                            |          |

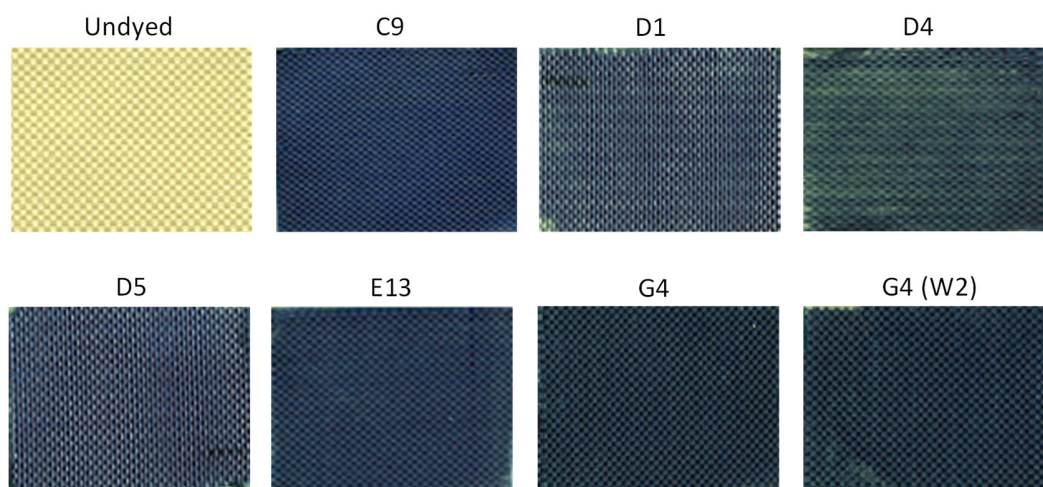

Figure S1. Scanned images of dyed samples in contrast with original undyed fabric (labels correspond to the sample numbers in Tables 3-5 and Figure 8; G4 (W2) indicates sample G4 after 2<sup>nd</sup> detergent wash)

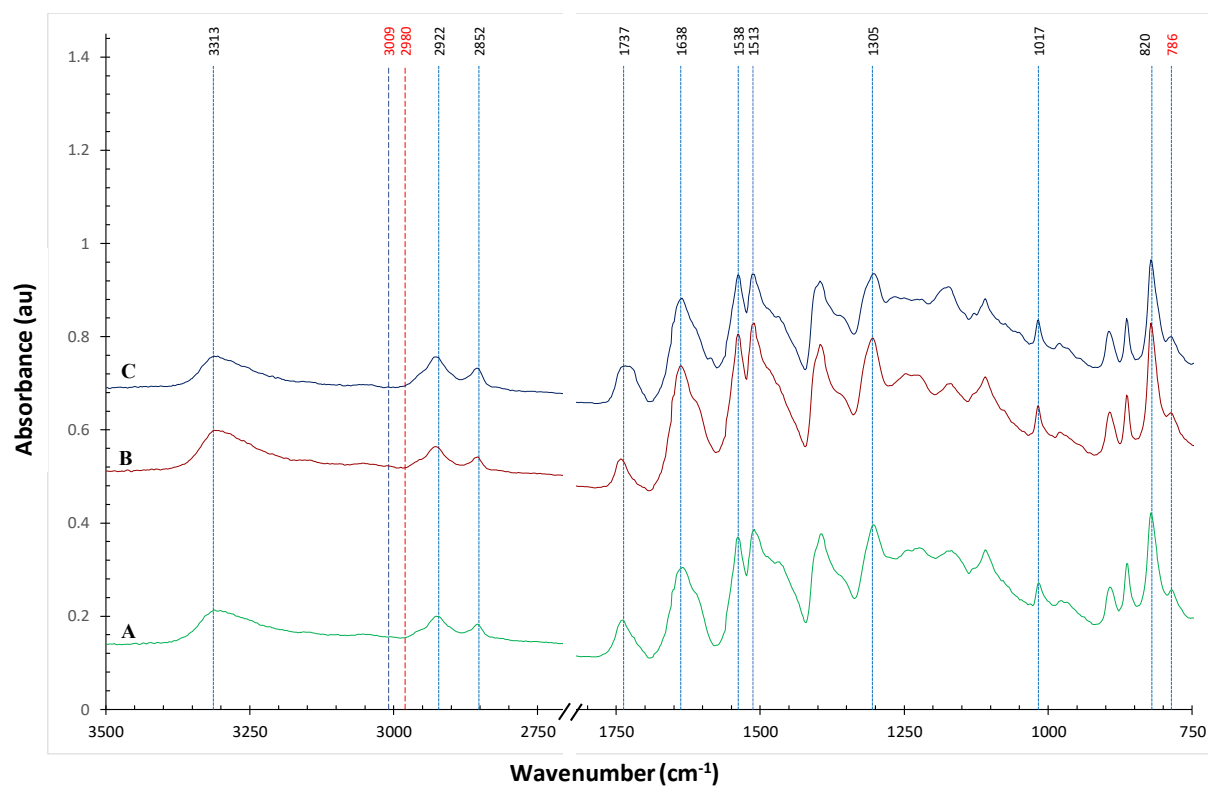

Figure S2. FTIR spectra of A) para-aramid sample after soaking in AA/Soy and subsequent NTP treatment; B) dyed para-aramid sample pretreated with AA/Soy with subsequent NTP treatment; C) dyed para-aramid sample pretreated with AESO with subsequent NTP treatment.

## References

1. Fernandes, M., Souto, A.P., Gama, M., and Dourado, F., *Bacterial Cellulose and Emulsified AESO Biocomposites as an Ecological Alternative to Leather*. Nanomaterials (Basel, Switzerland), 2019. **9**(12): p. 1710.
2. Guo, A., Cho, Y., and Petrović, Z.S., *Structure and properties of halogenated and nonhalogenated soy-based polyols*. Journal of Polymer Science Part A: Polymer Chemistry, 2000. **38**(21): p. 3900-3910.
3. Berkum, S., Dee, J., Philipse, A., and Ern , B., *Frequency-Dependent Magnetic Susceptibility of Magnetite and Cobalt Ferrite Nanoparticles Embedded in PAA Hydrogel*. International journal of molecular sciences, 2013. **14**: p. 10162-10177.
4. Behera, D. and Banthia, A.K., *Synthesis, characterization, and kinetics study of thermal decomposition of epoxidized soybean oil acrylate*. Journal of Applied Polymer Science, 2008. **109**(4): p. 2583-2590.
5. Larra aga, A., Petisco-Ferrero, S., Villanueva, R., Iturri, J., Moya, S., Meaurio, E., and Sarasua, J.-R., *Physicochemical properties of plasma polymerized acrylic acid,  -caprolactone and lactic acid films*. Society of Plastics Engineers - EUROTEC 2011 Conference Proceedings, 2011.
6. A Umemura, J. and A Hayashi, S., *Infrared Spectra and Molecular Configurations of Liquid and Crystalline Acrylic Acids*. Bulletin of Institute for Chemical Research, Kyoto University, 1975. **52**(4): p. 585-595.
7. Esen, H. and  ayli, G., *Epoxidation and polymerization of acrylated castor oil*. European Journal of Lipid Science and Technology, 2016. **118**(6): p. 959-966.
8. Saman, N.M., Ang, D.T.C., and Gan, S.N., *Acrylated Epoxidized Soybean Oil as a Green Alternative Healant in Development of Autonomous Self-Healing Materials*. Journal of Polymers and the Environment, 2019. **27**(1): p. 118-126.
9. Li, Y. and Sun, X.S., *Synthesis and characterization of acrylic polyols and polymers from soybean oils for pressure-sensitive adhesives*. RSC Advances, 2015. **5**(55): p. 44009-44017.
10. Habib, F. and Bajpai, M., *Synthesis characterization of acrylated epoxidized soybean oil for UV-cured coatings*. Chem. Chem. Technol., 2011. **5**.
11. Zhao, X., Yang, J., Tao, D., and Xu, X., *Synthesis and Tribological Properties of Air Plasma Polymerized Soybean Oil with N-Containing Structures*. Journal of the American Oil Chemists' Society, 2014. **91**(5): p. 827-837.
12. Lumakso, F., Rohman, A., M, H., Riyanto, S., and Yusof, F., *Detection and quantification of soybean and corn oils as adulterants in avocado oil using fourier transform mid infrared (FT-MIR) spectroscopy aided with multivariate calibration*. Jurnal Teknologi, 2015. **77**(1): p. 251-255.
13. Haijuan, K., Hui, S., Jin, C., Haiquan, D., Xiaoma, D., Mengmeng, Q., Muhuo, Y., and Youfeng, Z., *Improvement of adhesion of kevlar fabrics to epoxy by surface modification with acetic anhydride in supercritical carbon dioxide*. Polymer Composites, 2019. **40**(S1): p. E920-E927.
14. Mukherjee, M., Kumar, S., Bose, S., Das, C., and Kharitonov, A., *Study on the Mechanical, Rheological, and Morphological Properties of Short Kevlar<sup>TM</sup> Fiber/s-PS Composites*. Polymer-Plastics Technology and Engineering, 2008. **47**: p. 623-629.
